# Supplementary material
Source: PubMed Central journal article supplement (PMC7484436)
Supplement: NIHMS1609168-supplement-1.pdf [file NIHMS1609168-supplement-1.pdf]

| Supplemental Table 1. MHC-1 and TRIM5 $\alpha$ alleles |         |            |            |            |            |          |                |                               |
|--------------------------------------------------------|---------|------------|------------|------------|------------|----------|----------------|-------------------------------|
| <b>Controllers</b>                                     |         |            |            |            |            |          |                |                               |
| Animal#                                                |         | Mm0301     | Mm0512     | Mm0517     | Mm0303     | Mm0515   | Mm0516         | Mm0511                        |
| MHC-1 <sup>1</sup>                                     | major A | A1*0040102 | A1*0040102 | A1*0040102 | A1*0040102 | A1*03202 | A1*03202       | A1*10502                      |
|                                                        |         | A1*11001   | A1*01907   | A1*05602   | A1*05001   | A1*11001 | A1*04904       |                               |
|                                                        | minor A |            | A2*0526    |            | A2*0511    |          | A1*11001       | A2*0546                       |
|                                                        |         |            |            |            | A4*1403    |          |                |                               |
|                                                        | major B | B*4301     | B*4301     | B*8201N    | B*4301     | B*3301N  | B*3301N        | B*6601                        |
|                                                        |         | B*9201N    | B*6601     | I*0106N2   | B*9201N    | B*0401   | B*0401         | B*1601N                       |
|                                                        |         | B*38N      |            | B*4615N2   | B*0703     | B*38N    |                |                               |
|                                                        |         | B*66N1     |            |            | B*3901N    | B*66N1   |                |                               |
|                                                        | minor B | B*7301     | B*9201N    | B*0201     |            | I*0106N3 | B*6601         | B*4615N1                      |
|                                                        |         | I*0106N6   | B*2602     |            |            |          | B*3901N        | I*0106N5                      |
|                                                        |         |            |            |            |            |          |                | I*0106N1                      |
| TRIM5 alleles <sup>2</sup>                             |         | TFP/TFP    | TFP/TFP    | TFP/Q      | TFP/TFP    | Q/Cyp    | TFP/TFP        | TFP/TFP                       |
|                                                        |         | Mamu1/1    | Mamu1/3    | Mamu1/5    | Mamu1/1    | Mamu 5/7 | Mamu1/1        | Mamu1/3                       |
| <b>Non-controllers</b>                                 |         |            |            |            |            |          |                |                               |
| Animal#                                                |         | Mm0409     | Mm0518     | Mm0304     | Mm0513     |          | Mm0307         | <b>Haplotypes<sup>1</sup></b> |
| MHC-1 <sup>1</sup>                                     | major A | A1*10701   | A1*560202  | A1*01807   | A1*01807   |          | A1*02806       | <b>h</b>                      |
|                                                        |         | A1*560202  |            | A1*00802   | A1*02603   |          | A1*10502       | <b>g</b>                      |
|                                                        | minor A |            | A2*0503    | A2*0103    | A2*0103    |          | A2*0511        | <b>d</b>                      |
|                                                        |         |            |            | A4*1403    | A4*1403    |          |                | <b>93-06F1-2</b>              |
|                                                        | major B | B*1601N    | B*7702     | B*0101     | B*0101     |          | B*9601N        | <b>p</b>                      |
|                                                        |         | B*4615N1   |            | B*0702     | B*0702     |          | B*6601         | <b>q</b>                      |
|                                                        |         | I*0106N1   |            |            |            |          |                | <b>s</b>                      |
|                                                        | minor B | B*02N      | I*0107     |            | I*0106N4   |          |                |                               |
|                                                        |         | B*6001N    |            |            |            |          |                |                               |
|                                                        |         | I*0106N5   |            |            |            |          |                |                               |
|                                                        |         | B*0201     |            |            |            |          |                |                               |
| TRIM5 alleles <sup>2</sup>                             |         | TFP/TFP    | TFP/TFP    | TFP/TFP    | TFP/TFP    |          | not determined |                               |
|                                                        |         | Mamu3/3    | Mamu1/3    | Mamu3/3    | Mamu3/3    |          |                |                               |

<sup>1</sup>MHC-1 haplotypes as reported (Naruse et al. 2010. Immunogenetics. 62:601–11)

<sup>2</sup>TRIM5 alleles as reported (Wilson et al. 2008. J. Virol. 83:7243): Mamu1 to 3 encodes TFP; Mamu 4 to 6 encodes Q; Mamu7 encodes Cyp.

## Supplemental Fig.1

### Vaccination and Challenge Infections

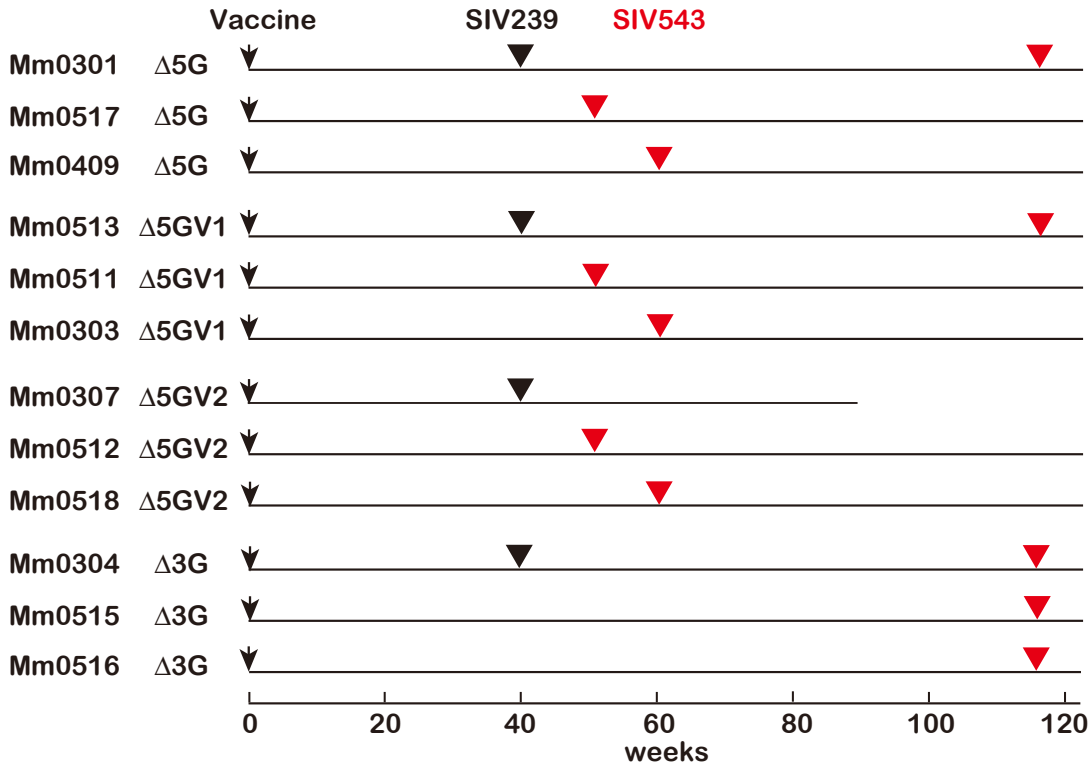

Timeline of the vaccination (100 TCID<sub>50</sub>) and challenge infection with SIVmac239 (1000 TCID<sub>50</sub>) and SIVsmE543-3 (1000 TCID<sub>50</sub>) are shown. The monkeys Mm0301, Mm0409, and Mm0517 were vaccinated with Δ5G, the monkeys Mm0303, Mm0511, and Mm0513 were vaccinated with Δ5GV1, the monkeys Mm0307, Mm0512, and Mm0518 were vaccinated with Δ5GV2. Mm0304, Mm0515, and Mm0516 were vaccinated with Δ3G. Four vaccinees (Mm0301, Mm0513, Mm0307, and Mm0304) were challenged with SIVmac239 at 40 weeks post-vaccination. All vaccinees (except Mm0307 who died with a cause unrelated to SIV infection), were challenged with a heterologous SIVsmE543-3. Mm0517 (Δ5G), Mm0511 (Δ5GV1), and Mm0512 (Δ5GV2) were challenged at 50 wpv; Mm0409 (Δ5G), Mm0303 (Δ5GV1), and Mm0518 (Δ5GV2) were challenged at 61 wpv; Mm0515 (Δ3G), Mm0516 (Δ3G) and three of SIVmac239-challenged animals (Mm0301, Mm0513 and Mm0304) were challenged at 117 wpv.

## Supplemental Fig. 2

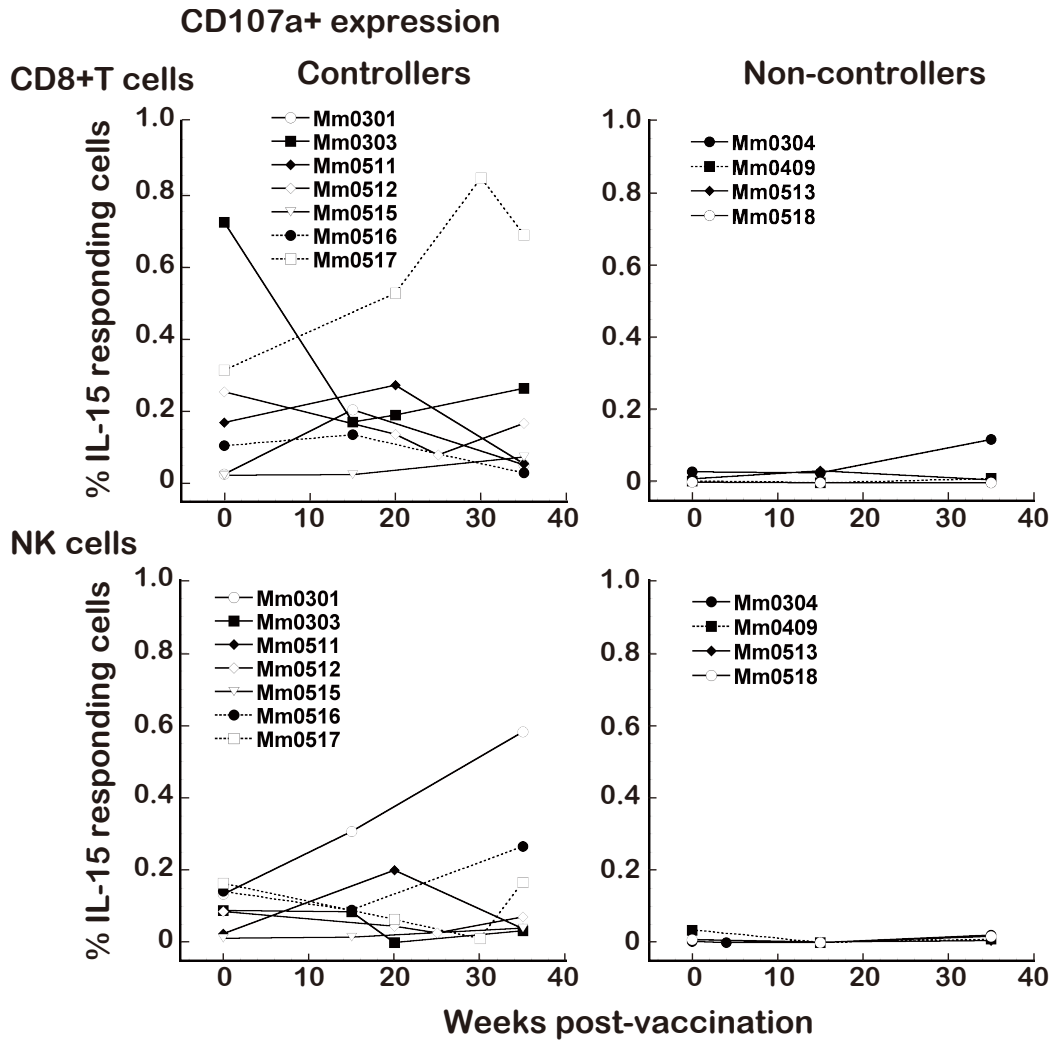

To see the effects of vaccination on IL-15 responding effector cells, the levels of CD107a expressing CD8+ T and NK cells in PBMCs from the vaccinees collected between pre-vac. and 35 wpv were examined by the ex-vivo assay. Whereas increases of the IL-15 responding NK cells were observed in the two vaccinees (Mm0301, Mm0516) that had NK specific responses following the challenge, the similar effect was not observed in the remaining controllers (Supplemental Fig. 3). The levels of the non-controllers were remained low at 15 wpv. Vaccination elicits vaccine specific cellular and humoral responses. However, vaccine may not influence on the levels of IL-15 responding cells because they are regulated by the innate immune cells such as monocytes and DCs (Fig.5).
